# Supplementary material for: An exploratory analysis of bezisterim treatment associated with decreased biological age acceleration, and improved clinical measure and biomarker changes in mild-to-moderate probable Alzheimer's disease
Source: Front Neurosci. 2025 May 2;19:1516746. doi: 10.3389/fnins.2025.1516746 (PMC12082838; doi:10.3389/fnins.2025.1516746)
Supplement: Supplementary file 2 [file Data_Sheet_2.xlsx]

## Sheet: Sheet1
Gene	CpG	Location	Clinical Measure	placebo r	placebo p	FDR <0.05 adjusted p	bezisterim r	besisterim p	FDR <0.05 adjusted p
NE3107
PLAAT5	cg23728669_BC11	Island Enhancer	ADL				-0.899296	9.10284e-07	0.0456753
	cg03932723_BC11	Island Enhancer	ADCOMS				0.495969	0.0428906
KCTD1	cg20382774_TC11	Island Promoter	CDR SB				0.918039	2.05415e-07	0.00903723
	cg20382774_TC11	Island Promoter	ADCOMS				0.865364	7.25567e-06	0.523243
	cg20382774_TC11	Island Promoter	GST				0.865688	7.13253e-06	0.640865
	cg20382774_TC12	Island Promoter	ADL				-0.783596	0.000198089
CALD1	cg02516134_BC21	TSS1500	CDR SB				-0.891323	1.57398e-06	0.0692426
	cg02516134_BC21		ADCOMS				-0.838466	2.62014e-05
	cg02516134_BC21	TSS1500;TSS1500	GST				-0.862323	8.50003e-06	0.76372
	cg02516134_BC21		ADL				0.505397	0.0384995
TMEM237	cg23849778_BC11	Island, Promoter	CDR SB				0.893227	1.38645e-06	0.0609942
TMEM237	cg23849778_BC11	Island, Promoter	ADCOMS				0.910301	3.94922e-07	0.0284829
TMEM237	cg23849778_BC11	Island, Promoter	GST				0.896839	1.08272e-06	0.0972886
TMEM237	cg23849778_BC11	Island, Promoter	ADL				-0.667104	0.00344093
KLHL31	cg25982641_BC21	TSS1500	Chol				0.908504	4.5582e-07	0.041558
DDR1	cg01598675_BC21	3UTR;exon_13	Cog12				-0.936542	3.18409e-08	0.00447501
	cg01598675_BC21	3UTR;exon_13	ADL				0.512009	0.0356298
CCL15-CCL14	cg26548883_TC21	TSS1500	Cog12				0.903273	6.80955e-07	0.0957001
	cg26548883_TC21	TSS1500	ADCOMS				0.695266	0.00194513
TGM6	cg02898994_TC21	TSS200	Glucose				0.905936	5.567e-07	0.00655438
TOE1	cg21853989_BC21	TSS1500	HOMA2 %S				-0.895245	1.20888e-06	0.0331258
	cg21853989_BC21	N_Shore	ADCOMS				-0.664742	0.00360011
PRRC2A	cg05182583_TC21	N_Shore	MCP1				0.918041	2.05383e-07	0.00682094
CABLES1	cg12892087_BC21	Enhancer	MMSE				0.919665	1.77599e-07	0.0254267
ZNF33B	cg21889224_TC21	TSS1500 S Shore	Mono				-0.90756	4.90896e-07	0.0211355
USP22	cg22310812_BC21	3UTR;exon_13	NPI				-0.916345	2.38281e-07	0.00833293
SPIN4	cg27119722_BC21	N_Shore	RANTES				0.898556	9.59532e-07	0.0661271
MMP12	cg23979520_BC21	TSS200	RANTES				-0.884289	2.46663e-06	0.169976
MMP12			InflammAgeAcceleration
VBP1	cg23350707_TC21	5UTR;exon_1	waist/hip ratio				0.922273	1.39363e-07	0.01
IL1RAPL1	cg26849945_BC21	TSS200	waist/hip ratio				-0.91763	2.12973e-07	0.0151332
GPR119	cg21700475_TC21	exon_1;5UTR	waist/hip ratio				0.913025	3.17059e-07	0.022
HEPH	cg02059755_BC21	TSS1500	waist/hip ratio				0.910673	3.84361e-07	0.0270506
TASL	cg02725485_BC21	3UTR;exon_3	waist/hip ratio				0.905206	5.8867e-07	0.0414271
RAB39B	cg10512285_BC21	Island, DMR	waist/hip ratio				-0.904856	6.04525e-07	0.0425416
CSTF2	cg02265919_TC21	Island, Promoter	waist/hip ratio				-0.904066	6.41673e-07	0.0451539
Placebo
RUBCNL	cg02850812_BC21	Island Enhancer	BPs	-0.913982	7.42473e-07	0.047738
CAT	cg22159421_TC11	Island, Promoter	CRP	0.936394	9.53589e-08	0.00285504
NCCRP1	cg21711545_BC21	Island Shelf	CRP	-0.912243	8.50077e-07	0.0254504
CAT	cg06908474_BC21	Island, Promoter	CRP	0.896644	2.56063e-06	0.0766549
CAT	cg02564456_BC21	Island, Promoter	CRP	0.89625	2.62697e-06	0.0786384
CAT	cg02109652_TC21	Island, Promoter	CRP	0.882561	6.02418e-06	0.18031
CAT	cg07768201_BC21	Island, Promoter	CRP	0.867994	1.31181e-05	0.392547
CAT	cg25060988_BC21	Shore, Promoter	CRP	0.859581	1.97501e-05	0.590843
CAT	cg03720043_TC21	Island, Promoter	CRP	0.85742	2.18466e-05	0.653498
ASCC3	cg12253828_BC21	Promoter	GFAP	0.91674	5.95448e-07	0.0383201
IVD	cg20278042_BC21	exon_12;3UTR	Ab42/40	0.923122	3.46675e-07	0.0259885
ZNF579	cg14402955_TC21	Island Enhancer	HOMA2 %B	-0.926014	2.67142e-07	0.0136475

## Sheet: Sheet1 (2)
Gene	CpG	Location	Clinical Measure	placebo r	placebo p	FDR <0.05 adjusted p	bezisterim r	besisterim p	FDR <0.05 adjusted p
NE3107
PLAAT5	cg23728669_BC11	Island Enhancer	ADL				-0.899296	9.10284e-07	0.0456753
KCTD1	cg20382774_TC11	Island Promoter	CDR SB				0.918039	2.05415e-07	0.00903723
	cg20382774_TC11	Island Promoter	ADCOMS				0.865364	7.25567e-06	0.523243
	cg20382774_TC11	Island Promoter	GST				0.865688	7.13253e-06	0.640865
	cg20382774_TC12	Island Promoter	ADL				-0.783596	0.000198089
CALD1	cg02516134_BC21	TSS1500	CDR SB				-0.891323	1.57398e-06	0.0692426
	cg02516134_BC21		ADCOMS				-0.838466	2.62014e-05
	cg02516134_BC21	TSS1500;TSS1500	GST				-0.862323	8.50003e-06	0.76372
	cg02516134_BC21		ADL				0.505397	0.0384995
TMEM237	cg23849778_BC11	Island, Promoter	CDR SB				0.893227	1.38645e-06	0.0609942
TMEM237	cg23849778_BC11	Island, Promoter	ADCOMS				0.910301	3.94922e-07	0.0284829
TMEM237	cg23849778_BC11	Island, Promoter	GST				0.896839	1.08272e-06	0.0972886
TMEM237	cg23849778_BC11	Island, Promoter	ADL				-0.667104	0.00344093
KLHL31	cg25982641_BC21	TSS1500	Chol				0.908504	4.5582e-07	0.041558
DDR1	cg01598675_BC21	3UTR;exon_13	Cog12				-0.936542	3.18409e-08	0.00447501
CCL15-CCL14	cg26548883_TC21	TSS1500	Cog12				0.903273	6.80955e-07	0.0957001
TGM6	cg02898994_TC21	TSS200	Glucose				0.905936	5.567e-07	0.00655438
TOE1	cg21853989_BC21	TSS1500	HOMA2 %S				-0.895245	1.20888e-06	0.0331258
PRRC2A	cg05182583_TC21	N_Shore	MCP1				0.918041	2.05383e-07	0.00682094
CABLES1	cg12892087_BC21	Enhancer	MMSE				0.919665	1.77599e-07	0.0254267
ZNF33B	cg21889224_TC21	TSS1500 S Shore	Mono				-0.90756	4.90896e-07	0.0211355
USP22	cg22310812_BC21	3UTR;exon_13	NPI				-0.916345	2.38281e-07	0.00833293
SPIN4	cg27119722_BC21	N_Shore	RANTES				0.898556	9.59532e-07	0.0661271
VBP1	cg23350707_TC21	5UTR;exon_1	waist/hip ratio				0.922273	1.39363e-07	0.01
IL1RAPL1	cg26849945_BC21	TSS200	waist/hip ratio				-0.91763	2.12973e-07	0.0151332
GPR119	cg21700475_TC21	exon_1;5UTR	waist/hip ratio				0.913025	3.17059e-07	0.022
HEPH	cg02059755_BC21	TSS1500	waist/hip ratio				0.910673	3.84361e-07	0.0270506
TASL	cg02725485_BC21	3UTR;exon_3	waist/hip ratio				0.905206	5.8867e-07	0.0414271
RAB39B	cg10512285_BC21	Island, DMR	waist/hip ratio				-0.904856	6.04525e-07	0.0425416
CSTF2	cg02265919_TC21	Island, Promoter	waist/hip ratio				-0.904066	6.41673e-07	0.0451539
Placebo
RUBCNL	cg02850812_BC21	Island Enhancer	BPs	-0.913982	7.42473e-07	0.047738
CAT	cg22159421_TC11	Island, Promoter	CRP	0.936394	9.53589e-08	0.00285504
NCCRP1	cg21711545_BC21	Island Shelf	CRP	-0.912243	8.50077e-07	0.0254504
CAT	cg06908474_BC21	Island, Promoter	CRP	0.896644	2.56063e-06	0.0766549
CAT	cg02564456_BC21	Island, Promoter	CRP	0.89625	2.62697e-06	0.0786384
CAT	cg02109652_TC21	Island, Promoter	CRP	0.882561	6.02418e-06	0.18031
CAT	cg07768201_BC21	Island, Promoter	CRP	0.867994	1.31181e-05	0.392547
CAT	cg25060988_BC21	Shore, Promoter	CRP	0.859581	1.97501e-05	0.590843
CAT	cg03720043_TC21	Island, Promoter	CRP	0.85742	2.18466e-05	0.653498
ASCC3	cg12253828_BC21	Promoter	GFAP	0.91674	5.95448e-07	0.0383201
IVD	cg20278042_BC21	exon_12;3UTR	Ab42/40	0.923122	3.46675e-07	0.0259885
ZNF579	cg14402955_TC21	Island Enhancer	HOMA2 %B	-0.926014	2.67142e-07	0.0136475

## Sheet: Sheet1 (3)
Gene	CpG	Location	Clinical Measure	Pearson r	Pearson p	FDR <0.05 adjusted p	name	Association with neurodegeneration
NE3107
PLAAT5	cg23728669_BC11	Island Enhancer	ADL	-0.899296	9.10284e-07	0.0456753	Phospholipase A and acyltransferase 5	PLAAT5 is involved in the synthesis of N-acetylethanolamines that activate GPR119, cannabinoid receptors, PPARa and PPARg, with activities in neuroinflammation, obesity, metabolic syndrome and anxiety, glucose homeostasis, anti-anaphylactic, analygesia and hypophagia 1,2.
GPR119	cg21700475_TC21	exon_1;5UTR	waist/hip ratio	0.913025	3.17059e-07	0.022	G protein-coupled receptor 119	GPR119 is activated by lipid amides and is involved in glucose-stimulated insulin secretion 3. GPR119 is functionally coupled to increased proglucagon (PG) gene expression that constitutes an essential first step in GLP-1 biosynthesis, ERK1 activation and insulin secretion 4,5. GPR119 is a recognized target for type 2 diabetes and metabolic dysfunction 6 and in addition to glucose and insulin reg…
USP22	cg22310812_BC21	3UTR;exon_13	NPI	-0.916345	2.38281e-07	0.00833293	ubiquitin specific peptidase 22	USP22 promotes NLRP3 degradation and inhibits NLRP3 inflammasome activation 9, and may stabilize HIF-1α via a HIF1a/USP22 positive feedback loop 10. TMEM237 was identified as a hypoxia-responsive gene, and HIF-1α directly bound to the promoter of TMEM237 to transactivate its expression 11.
TMEM237	cg23849778_BC11	Island, Promoter	ADCOMS	0.910301	3.94922e-07	0.0284829	Transmembrane protein 237	TMEM237 variants are associated with ciliopathy and Joubert syndrome 14, molar tooth sign, hypotonia, and neurodevelopment delays 12,13. In addition to the significant correlation with ADCOMS, the same CpG showed correlation trends with CDR-SB and with GST.
TMEM237	cg23849778_BC11	Island, Promoter	CDR SB	0.893227	1.38645e-06	0.0609942	Transmembrane protein 237
TMEM237	cg23849778_BC11	Island, Promoter	GST	0.896839	1.08272e-06	0.0972886	Transmembrane protein 237
VBP1	cg23350707_TC21	5UTR;exon_1	waist/hip ratio	0.922273	1.39363e-07	0.01	von Hippel-Lindau-binding protein 1	VBP1 interacts with an E-3 ubiquitin ligase that degrades HIF1- α in an oxygen-dependent manner, associated with upregulation of glycolytic genes and anaerobic ATP synthesis 14,15. VBP1 discriminates MCI and AD from healthy controls 16. Recent reports implicate HIF-1 as a central immunometabolic switch regulating microglial function that appears to be dysregulated in AD. The strongest AD trait co…
KLHL31	cg25982641_BC21	TSS1500	Chol	0.908504	4.5582e-07	0.041558	Kelch Like Family Member 31	KLHL31 proteins bind to the E3 ligase cullin 3 and are known to be involved in ubiquitination and may bind to antioxidant NRF2 and inflammatory IKKb proteins 19, stimulating NFkB and TNF 20. KLHL31 is associated with ion channel gating and apoptosis, and overexpression is associated with inhibition of TPA and serum response elements, JNK and c-Jun activation to decrease MAPK/JNK regulation of cel…
PRRC2A	cg05182583_TC21	N_Shore	MCP1	0.918041	2.05383e-07	0.00682094	proline rich coiled-coil 2A	PRRC2A is an N6-methyladenosine modified RNA reader that controls oligodendroglial specification and myelination 22. PRRC2A (Bat2) is localized in the vicinity of TNFa, and the class III region haplotype Bat2 TNFa linkage is associated with rheumatoid arthritis 23, age-at-onset of insulin-dependent diabetes mellitus (IDDM) and thought to be involved with the inflammatory process of pancreatic bet…
KCTD1	cg20382774_TC11	Island Promoter	CDR SB	0.918039	2.05415e-07	0.00903723	Potassium channel tetramerization domain containing 1	KCTD1 KCDT gene family is associated with neurodevelopmental and neuropsychiatric disorders 28. KCTD1 is a transcriptional repressor that may be associated with neural crest functions 29, Cu2+ induced protein fibril formation, cell toxicity, apoptosis and Ab protein misfolding 30.
DDR1	cg01598675_BC21	3UTR;exon_13	Cog12	-0.936542	3.18409e-08	0.00447501	Discoidin domain receptor tyrosine kinase 1	DDR1 is involved in oligodendrocyte maturation 31, regulates autophagy and reduces neurotoxic proteins and inflammation and is a therapeutic target in neurodegeneration; DDRs are upregulated in Alzheimer’s and Parkinson’s disease (PD), and DDRs knockdown reduces neurotoxic protein levels. 32. DDRs are upregulated in AD and PD brains, and knockdown reduces the levels of α-synuclein, tau, and β-amy…
TGM6	cg02898994_TC21	TSS200	Glucose	0.905936	5.567e-07	0.00655438	Transglutaminase 6	TGM6 catalyzes the cross-linking of proteins and the conjugation of polyamines to proteins. Mutations in this gene are associated with spinocerebellar ataxia type 35 (SCA35). PD patients with similar mutations progress more slowly than those with wild-type (WT) TGM6 even though transfection of cells expressing a-synuclein with WT TGM6 relieved cell damage, down-regulated a -synuclein and increase…
CABLES1	cg12892087_BC21	Enhancer	MMSE	0.919665	1.77599e-07	0.0254267	Cdk5 and Abl enzyme substrate 1	Cdk5 and Abl enzyme substrate 1 (CABLES1). c-Abl is activated in human Alzheimer's and Parkinson's diseases and in mouse models and neuronal culture in response to amyloid beta fibrils and oxidative stress. Overexpression of active c-Abl in adult mouse neurons results in neurodegeneration and neuroinflammation 40. CABLES1 is expression is a marker for astrocytes 41 and microglia 42, regulates neu…
IL1RAPL1	cg26849945_BC21	TSS200	waist/hip ratio	-0.91763	2.12973e-07	0.0151332	Interleukin 1 receptor accessory protein like 1	Interleukin 1 receptor accessory protein like 1 (IL1RAPL1) is a synaptic adhesion molecule localized at the postsynaptic membrane that regulates dendrite formation and mediates the activity of IL-1β on dendrite morphology 50. IL1RAPL1 and IL1RAPL2 seem not to be involved in inflammatory response via NFkB dependent signaling pathway and are unable to interact with any isoform of IL-1 receptors. IL…
HEPH	cg02059755_BC21	TSS1500	waist/hip ratio	0.910673	3.84361e-07	0.0270506	Hephaestin	Hephaestin (HEPH) is a multicopper ferroxidase involved in iron absorption, but it can also oxidize organic and biogenic amines 53. HEPH is involved in iron flux across the blood-brain-barrier brain microvascular endothelial cells 54,55, and iron homeostasis in the brain, and a genetic variant may be involved in migraine pathogenesis 56. Iron dyshomeostasis and ferroptosis may contribute to AD pr…
TASL	cg02725485_BC21	3UTR;exon_3	waist/hip ratio	0.905206	5.8867e-07	0.0414271	TLR Adaptor Interacting With Endolysosomal SLC15A4	TLR Adaptor Interacting with endolysosomal SLC15A4 (TASL) is involved in positive regulation of toll-like receptor signaling pathway as the SLC15A4-associated adaptor for Interferon regulatory factor 5 activation by TLR7-9, and is involved in systemic lupus erythermatosus 60, colitis 61 and TLR-triggered cytokine production 62.
RAB39B	cg10512285_BC21	Island, DMR	waist/hip ratio	-0.904856	6.04525e-07	0.0425416	Member RAS Oncogene Family	Member RAS Oncogene Family (RAB39B). Ras analogy in brain 39B (RAB39B) deletion or nonsense mutations cause gene cause familial PD. Knock-down of RAB39B caused impairment of macroautophagy/autophagy, which led to increased protein levels of α-synuclein and phospho-α-synucleinSer129 within endoplasmic reticulum (ER) and mitochondria, causing activation of ER stress, unfolded protein response, and …
CSTF2	cg02265919_TC21	Island, Promoter	waist/hip ratio	-0.904066	6.41673e-07	0.0451539	cleavage stimulation factor subunit 2	Cleavage stimulation factor subunit 2 (CSTF2). A missense mutation in the CSTF2 gene that impairs the function of the RNA recognition motif and causes defects in 3' end processing is associated with intellectual disability in humans. In mice, this mutation was sufficient to alter polyadenylation sites in over 1300 genes critical for brain development 68.
ZNF33B	cg21889224_TC21	TSS1500 S Shore	Mono	-0.90756	4.90896e-07	0.0211355	Zinc Finger Protein 33B	Zinc finger protein 33b (ZNF33B) cg21889224 methylation was correlated (Pearson r = -0.908, p = 4.9 e-7, FDR<0.05 adj. p = 0.021) with bezisterim subjects monocytes. ZNF33B is a transcriptional regulator that is associated with maturity onset diabetes of the young (Z-score = 3.97) https://maayanlab.cloud/archs4/gene/ZNF33B
TOE1	cg21853989_BC21	TSS1500	HOMA2 %S	-0.895245	1.20888e-06	0.0331258	Target Of EGR1, Exonuclease	Target Of EGR1, Exonuclease (TOE1). Missense variants in TOE1 gene are associated with pontocerebellar hypoplasia type 7(PCH7), a neurodegenerative disease with developmental delay, cognitive and psychomotor impairment 69. TOE1 acts as a 3' exonuclease for telomerase RNA and regulates telomerase RNP complex assembly. TOE1-deficient cells had impaired telomerase activity and shortened telomeres 70…
Placebo
CAT	cg22159421_TC11	Island, Promoter	CRP	0.936394	9.53589e-08	0.00285504	Catalase	Catalyse (CAT) is a key antioxidant enzyme in the body’s defense against oxidative stress, which play a role in the development of many chronic or late-onset diseases such as diabetes, asthma, AD, systemic lupus erythematosus, rheumatoid arthritis, and cancers. https://www.ncbi.nlm.nih.gov/gene/847. Aβ peptides trigger the buildup of hydrogen peroxide in neuroblastoma and hippocampal neuron cultu…
CAT	cg06908474_BC21	Island, Promoter	CRP	0.897	2.56063e-06	0.077	Catalase
CAT	cg02564456_BC21	Island, Promoter	CRP	0.896	2.62697e-06	0.079	Catalase
RUBCNL	cg02850812_BC21	Island Enhancer	BPs	-0.913982	7.42473e-07	0.047738	Rubicon Like Autophagy Enhancer	Rubicon Like Autophagy Enhancer (RUBCNL) is a risk factor associated with AD dysregulation of autophagy. The protein aggregates, i.e., the MAPT/tau tangles and extracellular Aβ plaques that contribute to neuronal cell death in AD, are mainly degraded by the autophagy-lysosomal pathway 74. RUBCNL mediates mTORC1 and GSK3-TIP20 in regulation of endocytic trafficking and autophagy and lipid metaboli…
NCCRP1	cg21711545_BC21	Island Shelf	CRP	-0.912243	8.50077e-07	0.0254504	F-Box Associated Domain Containing	F-Box Associated Domain Containing (NCCRP1) is an F-box protein (FBX050) involved in the degradation of misfolded proteins in ubiquitin ligase complexes 78.
ASCC3	cg12253828_BC21	Promoter	GFAP	0.91674	5.95448e-07	0.0383201	Activating Signal Cointegrator 1 Complex Subunit 3	Activating Signal Cointegrator 1 Complex Subunit 3 (ASCC3). The helicase ASCC3 functions as a negative regulator of interferon-stimulated genes 79, stabilizing STAT3 signaling and impairing the type I interferon response via CAND1-mediated ubiquitination inhibition of STAT3 80. DNA unwinding by ASCC3 helicase is coupled to ALKBH3-dependent DNA alkylation repair, and loss of ALKBH3 or ASCC3 leads …
IVD	cg20278042_BC21	exon_12;3UTR	Ab42/40	0.923122	3.46675e-07	0.0259885	Isovaleryl-CoA Dehydrogenase	Isovaleric acid (IVD) gene encodes isovaleryl-coA dehydrogenase an enzyme involved in the catabolism of valine, leucine and isoleucine, branched chain amino acids (BCAA) catalyzing the conversion of isovaleryl-CoA to 3-methylcrotonyl-CoA during leucine catabolism. IVD and autoantibodies to IVD are increased in AD 84. The IVD product isovaleric acid is associated with depression 85, and also is in…
ZNF579	cg14402955_TC21	Island Enhancer	HOMA2 %B	-0.926014	2.67142e-07	0.0136475	Zinc Finger Protein 579	Zinc Finger Protein 579 (ZNF579) binds to the ALOX5 promoter responsible for 5-lipozygenase biosynthesis of inflammatory leukotrienes 91, which contribute to the neuropathology of chronic neurodegenerative disorders including Alzheimer’s Disease (AD), where they mediate neuroinflammation and neuronal cell-death 92.
References
							1	Mock, E.D., Gagestein, B. & van der Stelt, M. Anandamide and other N-acylethanolamines: A class of signaling lipids with therapeutic opportunities. Prog Lipid Res 89, 101194 (2023).
							2	Im, D.S. GPR119 and GPR55 as Receptors for Fatty Acid Ethanolamides, Oleoylethanolamide and Palmitoylethanolamide. Int J Mol Sci 22(2021).
							3	Pola, S., et al. Discovery of a potent G-protein-coupled receptor 119 agonist for the treatment of type 2 diabetes. Bioorg Med Chem 35, 116071 (2021).
							4	Chepurny, O.G., et al. Stimulation of proglucagon gene expression by human GPR119 in enteroendocrine L-cell line GLUTag. Mol Endocrinol 27, 1267-1282 (2013).
							5	Arifin, S.A., et al. Oleoyl-lysophosphatidylinositol enhances glucagon-like peptide-1 secretion from enteroendocrine L-cells through GPR119. Biochim Biophys Acta Mol Cell Biol Lipids 1863, 1132-1141 (2018).
							6	Zhao, J., Zhao, Y., Hu, Y. & Peng, J. Targeting the GPR119/incretin axis: a promising new therapy for metabolic-associated fatty liver disease. Cell Mol Biol Lett 26, 32 (2021).
							7	Hu, Y.W., et al. A lincRNA-DYNLRB2-2/GPR119/GLP-1R/ABCA1-dependent signal transduction pathway is essential for the regulation of cholesterol homeostasis. J Lipid Res 55, 681-697 (2014).
							8	Carlessi, R., et al. GLP-1 receptor signalling promotes beta-cell glucose metabolism via mTOR-dependent HIF-1alpha activation. Sci Rep 7, 2661 (2017).
							9	Di, Q., et al. USP22 suppresses the NLRP3 inflammasome by degrading NLRP3 via ATG5-dependent autophagy. Autophagy 19, 873-885 (2023).
							10	Ling, S., et al. USP22 promotes hypoxia-induced hepatocellular carcinoma stemness by a HIF1alpha/USP22 positive feedback loop upon TP53 inactivation. Gut 69, 1322-1334 (2020).
							11	Chen, T., et al. HIF-1alpha-activated TMEM237 promotes hepatocellular carcinoma progression via the NPHP1/Pyk2/ERK pathway. Cell Mol Life Sci 80, 120 (2023).
							12	Karunakaran, K.B., Gabriel, G.C., Balakrishnan, N., Lo, C.W. & Ganapathiraju, M.K. Novel Protein-Protein Interactions Highlighting the Crosstalk between Hypoplastic Left Heart Syndrome, Ciliopathies and Neurodevelopmental Delays. Genes (Basel) 13(2022).
							13	Huang, L., et al. TMEM237 is mutated in individuals with a Joubert syndrome related disorder and expands the role of the TMEM family at the ciliary transition zone. Am J Hum Genet 89, 713-730 (2011).
							14	Kim, J.A., et al. VBP1 represses cancer metastasis by enhancing HIF-1alpha degradation induced by pVHL. FEBS J 285, 115-126 (2018).
							15	Lee, J.W., Ko, J., Ju, C. & Eltzschig, H.K. Hypoxia signaling in human diseases and therapeutic targets. Exp Mol Med 51, 1-13 (2019).
							16	Fernandez-Martinez, J.L., Alvarez-Machancoses, O., de Andres-Galiana, E.J., Bea, G. & Kloczkowski, A. Robust Sampling of Defective Pathways in Alzheimer's Disease. Implications in Drug Repositioning. Int J Mol Sci 21(2020).
							17	March-Diaz, R., et al. Hypoxia compromises the mitochondrial metabolism of Alzheimer's disease microglia via HIF1. Nat Aging 1, 385-399 (2021).
							18	Hai, Y., et al. HIF-1α serves as a co-linker between AD and T2DM. Biomed Pharmacol 171, 116158 (2024).
							19	Dhanoa, B.S., Cogliati, T., Satish, A.G., Bruford, E.A. & Friedman, J.S. Update on the Kelch-like (KLHL) gene family. Hum Genomics 7, 13 (2013).
							20	Mei, Z.Z., et al. Kelch-like Protein 21 (KLHL21) Targets IkappaB Kinase-beta to Regulate Nuclear Factor kappa-Light Chain Enhancer of Activated B Cells (NF-kappaB) Signaling Negatively. J Biol Chem 291, 18176-18189 (2016).
							21	Yu, W., et al. A novel human BTB-kelch protein KLHL31, strongly expressed in muscle and heart, inhibits transcriptional activities of TRE and SRE. Mol Cells 26, 443-453 (2008).
							22	Wu, R., et al. A novel m(6)A reader Prrc2a controls oligodendroglial specification and myelination. Cell Res 29, 23-41 (2019).
							23	Singal, D.P., Li, J. & Zhu, Y. HLA class III region and susceptibility to rheumatoid arthritis. Clin Exp Rheumatol 18, 485-491 (2000).
							24	Hashimoto, M., et al. Genetic contribution of the BAT2 gene microsatellite polymorphism to the age-at-onset of insulin-dependent diabetes mellitus. Hum Genet 105, 197-199 (1999).
							25	Zhang, J., et al. Common genetic variants in PRRC2A are associated with both neuromyelitis optica spectrum disorder and multiple sclerosis in Han Chinese population. J Neurol 268, 506-515 (2021).
							26	Diakite, M., et al. A genetic association study in the Gambia using tagging polymorphisms in the major histocompatibility complex class III region implicates a HLA-B associated transcript 2 polymorphism in severe malaria susceptibility. Hum Genet 125, 105-109 (2009).
							27	Shi, J., et al. Evaluation of genetic susceptibility loci for obesity in Chinese women. Am J Epidemiol 172, 244-254 (2010).
							28	Teng, X., et al. KCTD: A new gene family involved in neurodevelopmental and neuropsychiatric disorders. CNS Neurosci Ther 25, 887-902 (2019).
							29	Raymundo, J.R., et al. KCTD1/KCTD15 complexes control ectodermal and neural crest cell functions, and their impairment causes aplasia cutis. J Clin Invest 134(2023).
							30	Liu, Z., et al. Bivalent Copper Ions Promote Fibrillar Aggregation of KCTD1 and Induce Cytotoxicity. Sci Rep 6, 32658 (2016).
							31	Silva, M.E., et al. DDR1 and Its Ligand, Collagen IV, Are Involved in In Vitro Oligodendrocyte Maturation. Int J Mol Sci 24(2023).
							32	Fowler, A.J., et al. Discoidin Domain Receptor 1 is a therapeutic target for neurodegenerative diseases. Hum Mol Genet 29, 2882-2898 (2020).
							33	Hebron, M., et al. Discoidin domain receptor inhibition reduces neuropathology and attenuates inflammation in neurodegeneration models. J Neuroimmunol 311, 1-9 (2017).
							34	Chen, K., et al. TGM6 variants in Parkinson's disease: clinical findings and functional evidence. J Integr Neurosci 19, 51-64 (2020).
							35	Moore, A.Z., et al. Change in Epigenome-Wide DNA Methylation Over 9 Years and Subsequent Mortality: Results From the InCHIANTI Study. J Gerontol A Biol Sci Med Sci 71, 1029-1035 (2016).
							36	Takeshita, L.Y., et al. Genomics and transcriptomics landscapes associated to changes in insulin sensitivity in response to endurance exercise training. Sci Rep 11, 23314 (2021).
							37	Bernassola, F., et al. Role of transglutaminase 2 in glucose tolerance: knockout mice studies and a putative mutation in a MODY patient. FASEB J 16, 1371-1378 (2002).
							38	Rossin, F., et al. Transglutaminase 2 ablation leads to mitophagy impairment associated with a metabolic shift towards aerobic glycolysis. Cell Death Differ 22, 408-418 (2015).
							39	Kumar, S., Donti, T.R., Agnihotri, N. & Mehta, K. Transglutaminase 2 reprogramming of glucose metabolism in mammary epithelial cells via activation of inflammatory signaling pathways. Int J Cancer 134, 2798-2807 (2014).
							40	Schlatterer, S.D., Acker, C.M. & Davies, P. c-Abl in neurodegenerative disease. J Mol Neurosci 45, 445-452 (2011).
							41	Kuhn, A., et al. Cell population-specific expression analysis of human cerebellum. BMC Genomics 13, 610 (2012).
							42	Dolan, M.J., et al. Exposure of iPSC-derived human microglia to brain substrates enables the generation and manipulation of diverse transcriptional states in vitro. Nat Immunol 24, 1382-1390 (2023).
							43	Zukerberg, L.R., et al. Cables links Cdk5 and c-Abl and facilitates Cdk5 tyrosine phosphorylation, kinase upregulation, and neurite outgrowth. Neuron 26, 633-646 (2000).
							44	He, L., et al. CABLES1 Deficiency Impairs Quiescence and Stress Responses of Hematopoietic Stem Cells in Intrinsic and Extrinsic Manners. Stem Cell Reports 13, 274-290 (2019).
							45	Gerrits, E., et al. Neurovascular dysfunction in GRN-associated frontotemporal dementia identified by single-nucleus RNA sequencing of human cerebral cortex. Nat Neurosci 25, 1034-1048 (2022).
							46	Wang, X.L. & Li, L. Cell type-specific potential pathogenic genes and functional pathways in Alzheimer's Disease. BMC Neurol 21, 381 (2021).
							47	Shi, Z., et al. Cables1 complex couples survival signaling to the cell death machinery. Cancer Res 75, 147-158 (2015).
							48	Shi, Z., et al. Cables1 controls p21/Cip1 protein stability by antagonizing proteasome subunit alpha type 3. Oncogene 34, 2538-2545 (2015).
							49	Hetty, S., et al. CABLES1 expression is reduced in human subcutaneous adipose tissue in obesity and type 2 diabetes but may not directly impact adipocyte glucose and lipid metabolism. Adipocyte 12, 2242997 (2023).
							50	Montani, C., Gritti, L., Beretta, S., Verpelli, C. & Sala, C. The Synaptic and Neuronal Functions of the X-Linked Intellectual Disability Protein Interleukin-1 Receptor Accessory Protein Like 1 (IL1RAPL1). Dev Neurobiol 79, 85-95 (2019).
							51	Youngs, E.L., Henkhaus, R., Hellings, J.A. & Butler, M.G. IL1RAPL1 gene deletion as a cause of X-linked intellectual disability and dysmorphic features. Eur J Med Genet 55, 32-36 (2012).
							52	Ramos-Brossier, M., et al. Novel IL1RAPL1 mutations associated with intellectual disability impair synaptogenesis. Hum Mol Genet 24, 1106-1118 (2015).
							53	Vashchenko, G., Bleackley, M.R., Griffiths, T.A. & MacGillivray, R.T. Oxidation of organic and biogenic amines by recombinant human hephaestin expressed in Pichia pastoris. Arch Biochem Biophys 514, 50-56 (2011).
							54	McCarthy, R.C. & Kosman, D.J. Ferroportin and exocytoplasmic ferroxidase activity are required for brain microvascular endothelial cell iron efflux. J Biol Chem 288, 17932-17940 (2013).
							55	Ficiara, E., Munir, Z., Boschi, S., Caligiuri, M.E. & Guiot, C. Alteration of Iron Concentration in Alzheimer's Disease as a Possible Diagnostic Biomarker Unveiling Ferroptosis. Int J Mol Sci 22(2021).
							56	Maher, B.H., et al. An X chromosome association scan of the Norfolk Island genetic isolate provides evidence for a novel migraine susceptibility locus at Xq12. PLoS One 7, e37903 (2012).
							57	Wang, F., et al. Iron Dyshomeostasis and Ferroptosis: A New Alzheimer's Disease Hypothesis? Front Aging Neurosci 14, 830569 (2022).
							58	Hudson, D.M., et al. Human hephaestin expression is not limited to enterocytes of the gastrointestinal tract but is also found in the antrum, the enteric nervous system, and pancreatic beta-cells. Am J Physiol Gastrointest Liver Physiol 298, G425-432 (2010).
							59	Aslan, E.S., et al. Association between iron metabolism and SARS-COV-2 infection, determined by ferritin, hephaestin and hypoxia-induced factor-1 alpha levels in COVID-19 patients. Mol Biol Rep 50, 2471-2478 (2023).
							60	Heinz, L.X., et al. TASL is the SLC15A4-associated adaptor for IRF5 activation by TLR7-9. Nature 581, 316-322 (2020).
							61	Sasawatari, S., et al. The solute carrier family 15A4 regulates TLR9 and NOD1 functions in the innate immune system and promotes colitis in mice. Gastroenterology 140, 1513-1525 (2011).
							62	Kobayashi, T., et al. The histidine transporter SLC15A4 coordinates mTOR-dependent inflammatory responses and pathogenic antibody production. Immunity 41, 375-388 (2014).
							63	Chiu, C.C., et al. Deficiency of RAB39B Activates ER Stress-Induced Pro-apoptotic Pathway and Causes Mitochondrial Dysfunction and Oxidative Stress in Dopaminergic Neurons by Impairing Autophagy and Upregulating alpha-Synuclein. Mol Neurobiol 60, 2706-2728 (2023).
							64	Dayan, R., et al. Novel RAB39B Mutation Causes Parkinsonism in Males with Developmental Disorder. Mov Disord Clin Pract 11, 306-308 (2024).
							65	Mignogna, M.L., et al. Clinical characterization of a novel RAB39B nonstop mutation in a family with ASD and severe ID causing RAB39B downregulation and study of a Rab39b knock down mouse model. Hum Mol Genet 31, 1389-1406 (2022).
							66	Koss, D.J., et al. RAB39B is redistributed in dementia with Lewy bodies and is sequestered within abeta plaques and Lewy bodies. Brain Pathol 31, 120-132 (2021).
							67	Shi, C.H., et al. A novel RAB39B gene mutation in X-linked juvenile parkinsonism with basal ganglia calcification. Mov Disord 31, 1905-1909 (2016).
							68	Grozdanov, P.N., et al. A missense mutation in the CSTF2 gene that impairs the function of the RNA recognition motif and causes defects in 3' end processing is associated with intellectual disability in humans. Nucleic Acids Res 48, 9804-9821 (2020).
							69	Wang, C., Ge, Y., Li, R., He, G. & Lin, Y. Novel compound heterozygous missense variants in TOE1 gene associated with pontocerebellar hypoplasia type 7. Gene 862, 147250 (2023).
							70	Deng, T., et al. TOE1 acts as a 3' exonuclease for telomerase RNA and regulates telomere maintenance. Nucleic Acids Res 47, 391-405 (2019).
							71	Kow, R.L., et al. Distinct Poly(A) nucleases have differential impact on sut-2 dependent tauopathy phenotypes. Neurobiol Dis 147, 105148 (2021).
							72	Habib, L.K., Lee, M.T. & Yang, J. Inhibitors of catalase-amyloid interactions protect cells from beta-amyloid-induced oxidative stress and toxicity. J Biol Chem 285, 38933-38943 (2010).
							73	Yakunin, E., et al. The regulation of catalase activity by PPAR gamma is affected by alpha-synuclein. Ann Clin Transl Neurol 1, 145-159 (2014).
							74	Giuliano, S., et al. Should evidence of an autolysosomal de-acidification defect in Alzheimer and Parkinson diseases call for caution in prescribing chronic PPI and DMARD? Autophagy 19, 2800-2806 (2023).
							75	Cheng, X., et al. Pacer Is a Mediator of mTORC1 and GSK3-TIP60 Signaling in Regulation of Autophagosome Maturation and Lipid Metabolism. Mol Cell 73, 788-802 e787 (2019).
							76	Huisman, C., et al. Functional validation of putative tumor suppressor gene C13ORF18 in cervical cancer by Artificial Transcription Factors. Mol Oncol 7, 669-679 (2013).
							77	Huisman, C., et al. Re-expression of Selected Epigenetically Silenced Candidate Tumor Suppressor Genes in Cervical Cancer by TET2-directed Demethylation. Mol Ther 24, 536-547 (2016).
							78	Kallio, H., et al. Characterization of non-specific cytotoxic cell receptor protein 1: a new member of the lectin-type subfamily of F-box proteins. PLoS One 6, e27152 (2011).
							79	Li, J., et al. A short hairpin RNA screen of interferon-stimulated genes identifies a novel negative regulator of the cellular antiviral response. mBio 4, e00385-00313 (2013).
							80	Ao, Y.Q., et al. ASCC3 promotes the immunosuppression and progression of non-small cell lung cancer by impairing the type I interferon response via CAND1-mediated ubiquitination inhibition of STAT3. J Immunother Cancer 11(2023).
							81	Dango, S., et al. DNA unwinding by ASCC3 helicase is coupled to ALKBH3-dependent DNA alkylation repair and cancer cell proliferation. Mol Cell 44, 373-384 (2011).
							82	Nair, D., et al. Discovery of a neuromuscular syndrome caused by biallelic variants in ASCC3. HGG Adv 2, 100024 (2021).
							83	De Jager, C.H., White, C.C., Bennett, D.A. & Ma, Y. Neuroticism alters the transcriptome of the frontal cortex to contribute to the cognitive decline and onset of Alzheimer's disease. Transl Psychiatry 11, 139 (2021).
							84	San Segundo-Acosta, P., et al. Multiomics Profiling of Alzheimer's Disease Serum for the Identification of Autoantibody Biomarkers. J Proteome Res 20, 5115-5130 (2021).
							85	Szczesniak, O., Hestad, K.A., Hanssen, J.F. & Rudi, K. Isovaleric acid in stool correlates with human depression. Nutr Neurosci 19, 279-283 (2016).
							86	Zabin, I. & Bloch, K. Studies on the utilization of isovaleric acid in cholesterol synthesis. J Biol Chem 192, 267-273 (1951).
							87	Tynkkynen, J., et al. Association of branched-chain amino acids and other circulating metabolites with risk of incident dementia and Alzheimer's disease: A prospective study in eight cohorts. Alzheimers Dement 14, 723-733 (2018).
							88	Zhao, X., et al. The Relationship between Branched-Chain Amino Acid Related Metabolomic Signature and Insulin Resistance: A Systematic Review. J Diabetes Res 2016, 2794591 (2016).
							89	Lustgarten, M.S., Price, L.L., Chale, A., Phillips, E.M. & Fielding, R.A. Branched chain amino acids are associated with muscle mass in functionally limited older adults. J Gerontol A Biol Sci Med Sci 69, 717-724 (2014).
							90	Knopman, D.S., Edland, S.D., Cha, R.H., Petersen, R.C. & Rocca, W.A. Incident dementia in women is preceded by weight loss by at least a decade. Neurology 69, 739-746 (2007).
							91	Schlag, K., Steinhilber, D., Karas, M. & Sorg, B.L. Analysis of proximal ALOX5 promoter binding proteins by quantitative proteomics. FEBS J 287, 4481-4499 (2020).
							92	Michael, J., et al. Microglia depletion diminishes key elements of the leukotriene pathway in the brain of Alzheimer's Disease mice. Acta Neuropathol Commun 8, 129 (2020).
